# Supplementary material for: Organic additive free synthesis of mesoporous naoncrystalline NaA zeolite using high concentration inorganic precursors
Source: Royal Society of Chemistry journal article supplement (doi:10.1039/c2jm14848j), 2012-01-01
Supplement: c2jm14848j.pdf [file c2jm14848j.pdf]

ELECTRONIC SUPPLEMENTARY INFORMATION

**Organic additive free synthesis of mesoporous naoncrystalline NaA zeolite  
using high concentration inorganic precursors**

Pankaj Sharma,<sup>a</sup> Jeong Gu Yeo,<sup>a</sup> Dong Kook Kim,<sup>a</sup> and Churl Hee Cho\*<sup>b</sup>

<sup>a</sup>Energy Materials Center, Korea Institute of Energy Research, 71-2 Jang-dong, Yuseong-gu,  
Daejeon 305-343, Republic of Korea

<sup>b</sup>Graduate School of Green Energy Technology, Chungnam National University, 99 Daehak-  
ro, Yuseong-gu, Daejeon 305-764, Republic of Korea

## SI1

Physical properties of nano size NaA zeolite crystals obtained from N<sub>2</sub> and Ar adsorption/desorption studies

| Physical parameters           | N <sub>2</sub> (adsorption/desorption)                             | Ar (adsorption/desorption)                                         |
|-------------------------------|--------------------------------------------------------------------|--------------------------------------------------------------------|
| BET surface area              | 22.27 m <sup>2</sup> g <sup>-1</sup>                               | 30.37 m <sup>2</sup> g <sup>-1</sup>                               |
| Langmuir surface area         | 33.85 m <sup>2</sup> g <sup>-1</sup>                               | 46.37 m <sup>2</sup> g <sup>-1</sup>                               |
| Single point surface area     | 22.10 m <sup>2</sup> g <sup>-1</sup> (at P/P <sub>0</sub> = 0.30)  | 26.60 m <sup>2</sup> g <sup>-1</sup> (at P/P <sub>0</sub> = 0.22)  |
| Total pore volume             | 0.049 cm <sup>3</sup> g <sup>-1</sup> (at P/P <sub>0</sub> = 0.97) | 0.102 cm <sup>3</sup> g <sup>-1</sup> (at P/P <sub>0</sub> = 0.99) |
| <b><i>t</i>-plot</b>          |                                                                    |                                                                    |
| Mesopore volume               | 0.046 cm <sup>3</sup> g <sup>-1</sup>                              | -                                                                  |
| Micropore area                | 5.99 m <sup>2</sup> g <sup>-1</sup>                                | -                                                                  |
| External surface area         | 16.28 m <sup>2</sup> g <sup>-1</sup>                               | 41.11 m <sup>2</sup> g <sup>-1</sup>                               |
| <b><i>HK method</i></b>       |                                                                    |                                                                    |
| Maximum pore volume           | 0.081 cm <sup>3</sup> g <sup>-1</sup> (at P/P <sub>0</sub> = 0.99) | 0.008 cm <sup>3</sup> g <sup>-1</sup> (at P/P <sub>0</sub> = 0.10) |
| Median pore diameter          | 67.9 nm                                                            | 1.07 nm                                                            |
| <b><i>DA method</i></b>       |                                                                    |                                                                    |
| Limiting micropore capacity   | 16.41 cm <sup>3</sup> g <sup>-1</sup> S.T.P.                       | -                                                                  |
| Limiting micropore volume     | 0.025 cm <sup>3</sup> g <sup>-1</sup>                              | -                                                                  |
| Equivalent surface area       | 36.86 m <sup>2</sup> g <sup>-1</sup>                               | -                                                                  |
| Mean equivalent pore diameter | 2.76 nm                                                            | -                                                                  |
